# Supplementary material for: Nutrient Release Pattern and Greenhouse-Grown Swiss Chard Response to Biochar Inoculated with Vermicast
Source: Hindawi journal article supplement (doi:10.1155/2020/7852187), 2020-04-14
Supplement: f1 [file 7852187.f1.xlsx]

## Sheet: Salt
Time (hr)	Time (min)	DWCB	VTCB	SVCB	Biochar	Promix-BX
0.116667	7	54.0667	43	46.7667	39.5333	79.3
0.366667	22	53.5333	46.3	43.6	48.9333	74.8333
0.616667	37	62.8333	48.8333	46.3	50.4333	83.4333
1.11667	67	66.1667	50.1667	49.9667	67.8	85
2	120	69.7667	56.0667	57.9333	72.7333	88.1333
4	240	76.9333	64.0667	62.8667	76.4667	95.5333
8	480	75.7667	75.9	76.3333	82.0667	109
16	960	85.9	76.5333	85.5	102.233	117
24	1440	86.1	83.2333	92.7667	94.8333	121.333
39	2340	93.4	90.4	99.7333	105.333	151.333
51	3060	97.2	94.6667	105.333	110.333	133.333
63	3780	124.667	99.4667	109.667	114	144
75	4500	124	103.333	113	116.667	144.667
87	5220	112	107.333	118.667	120.667	157
99	5940	113.667	112.333	118.333	124	154.667
111	6660	118.667	116	116.667	126.333	160
123	7380	118	116.333	123.667	131	164.333
135	8100	123	118.667	124.333	131.333	169
147	8820	122.667	121.667	126.333	134.333	173.667
159	9540	126.333	121.667	129	136	179
171	10260	128.333	124	131.667	139	169.333
183	10980	133	127.333	132.333	141.667	180.333
195	11700	133.667	129	133	141	174.667
207	12420	150.333	129.333	133.667	142.667	190
219	13140	145.667	131.333	135.333	142.667	179.333
231	13860	158.667	131.667	135.333	146.667	188.667
243	14580	142	135.333	137.333	147	180.667
255	15300	141.667	133.667	139	148.333	200.333
267	16020	144.667	136.333	138.667	147.667	208
279	16740	166.333	137.667	140.333	148.333	190.667
291	17460	149.333	139	141.667	150	201.333
327	19620	158	141.333	143.333	152.333	206.333
351	21060	157	143.667	146.333	154	198.667
495	29700	176	155	163	165.333	203.667

## Sheet: EC
Time (hr)	Time (min)	DWCB	VTCB	SVCB	Biochar	Promix-BX
0.116667	7	124.867	96.9333	106.533	86.3667	192.767
0.366667	22	124.533	105.767	97.5	112.8	181.8
0.616667	37	148.733	112.5	104.8	117.567	203.233
1.11667	67	157.2	115.867	113.6	161.233	216.667
2	120	166.6	132.233	137.533	173.167	234
4	240	184.567	152.267	149.7	181.833	265
8	480	182.233	182.233	183	196.7	288
16	960	207.3	181.867	206	221.667	296.333
24	1440	206.567	201.2	224	229.333	369.333
39	2340	225.667	217.667	242.333	255	326
51	3060	234.667	229	255.333	267.333	352.333
63	3780	302.667	239.333	265.333	276	352.333
75	4500	300.667	249.667	274	283.333	384.333
87	5220	272.333	260	288	293.667	377.333
99	5940	272.667	272	287.667	301.667	387
111	6660	288.333	282	289.667	308	401
123	7380	283.333	282.333	300.667	319.333	410
135	8100	297.667	286.333	304	321	423.667
147	8820	297.667	296.333	308	327	438
159	9540	307	296.333	315.667	332	414
171	10260	316	304	319.333	338.667	440
183	10980	323.333	309.667	324.333	347	424.333
195	11700	328.333	316	325.667	344.667	461.667
207	12420	364	316.333	326.667	348	436.333
219	13140	355.667	320	329.333	347.667	464
231	13860	386	320	330.333	357.667	443.667
243	14580	346.333	328.667	333.333	356	513
255	15300	344	325.333	337	360	500
267	16020	352	331	337.333	360	465.667
279	16740	350	335.333	341.667	365	492.667
291	17460	364.667	336.333	344	365.667	502.333
327	19620	385	344	348.667	371.667	483
351	21060	389.667	351	357	374.667	496.333
495	29700	430.333	378.667	398.667	404.667	506.333

## Sheet: pH
Time (hr)	Time (min)	DWCB	VTCB	SVCB	Biochar	Promix-BX
0.116667	7	7.66667	7.52667	7.23	7.71	7.68
0.366667	22	7.33333	7.44	7.09	7.39333	7.49333
0.616667	37	7.52333	7.58333	7.07667	7.42667	7.49667
1.11667	67	7.98333	7.72	7.33	7.75333	7.6
2	120	8.19667	8.11333	7.68333	7.80667	7.66333
4	240	8.37	8.30333	8.05333	8.29667	7.72667
8	480	8.49333	8.27333	7.96	8.24	7.84
16	960	8.16	7.57333	7.42667	7.89333	7.79667
24	1440	7.44667	7.42333	7.00333	7.21	7.42333
39	2340	6.99	7.09667	7.05667	7.37333	7.70667
51	3060	7.09667	7.21	7.08	7.26667	7.41333
63	3780	7.06667	7.08667	7.09667	7.26667	7.58
75	4500	7.06333	7.11667	7.05333	7.20667	7.60333
87	5220	7.05333	7.15	7.11	7.17667	7.8
99	5940	7.03333	7.22667	7.06	7.18	7.44
111	6660	7.05667	7.22333	7.12	7.22	7.41333
123	7380	7.02	7.22	7.11	7.20333	7.74667
135	8100	7.19333	7.21667	7.14333	7.23	7.64
147	8820	7.02333	7.25	7.13333	7.23667	7.47333
159	9540	7.01333	7.22333	7.17333	7.30333	7.55
171	10260	7.18	7.27	7.09667	7.23333	7.62667
183	10980	7.07333	7.19667	7.21	7.30667	7.61
195	11700	7.18333	7.24667	7.23	7.3	7.58667
207	12420	7.04667	7.26	7.18333	7.24	7.84
219	13140	7.14333	7.16667	7.13333	7.19	7.59667
231	13860	7.01	7.12667	7.13667	7.24333	7.94333
243	14580	7.03	7.14667	7.11	7.19	7.64667
255	15300	6.90333	7.08667	7.07333	7.2	8.25667
267	16020	7.08	7.11667	7.07	7.16333	7.98
279	16740	6.93	7.12	7.14333	7.20333	7.64
291	17460	6.92	7.14	7.09333	7.12667	7.87667
327	19620	6.88	7.16	7.16	7.23667	7.72667
351	21060	6.87	7.19	7.18	7.28	7.83333
495	29700	7.36667	7.33667	7.07333	7.47	7.93333

## Sheet: TDS
Time (hr)	Time (min)	DWCB	VTCB	SVCB	Biochar	Promix-BX
0.116667	7	88.5333	68.8	75.6	62.6	137
0.366667	22	88.4	75.1333	69.5667	80.2333	128.667
0.616667	37	105.667	53.2	74.4	83.6	143.667
1.11667	67	113.333	82.4	80.9	114.333	153.333
2	120	118.667	93.8	96.2667	123	166.333
4	240	131	108	106	129.333	189.333
8	480	129.333	129.333	130	140	204.333
16	960	147	129.333	146.333	176.333	210.333
24	1440	147	143	159.333	162.667	262.333
39	2340	160.333	154.667	171.667	181	231.667
51	3060	166.667	162.667	181.333	190	250
63	3780	198.667	170.667	188.333	196.333	250.333
75	4500	213.667	175	194.333	201.333	272.333
87	5220	193.333	184.333	204.667	208.667	268
99	5940	194.667	193.333	204.333	214.333	276.667
111	6660	204.667	200.333	205.667	219	285.333
123	7380	203.333	200.667	210	226.667	290
135	8100	212	205	216	228	300.667
147	8820	211.333	210.333	218.667	232	310.667
159	9540	218.667	210.333	224.333	236.333	294.333
171	10260	224.333	215.667	227.333	240.667	312.333
183	10980	229.667	220	230	246.333	301.667
195	11700	233	224.667	231.333	245	328
207	12420	261	225	231.667	247	309.667
219	13140	252.667	227.333	233.667	247	329.333
231	13860	274	227.333	234.333	254	314.667
243	14580	245.333	233.667	236.333	253.333	350
255	15300	244	231	239.333	255.667	355
267	16020	250	234.667	240	255.667	330.667
279	16740	287.333	237.667	242.333	259.333	350
291	17460	258.667	239.333	244.333	259.667	356.333
327	19620	273.333	240	248	263.333	343.333
351	21060	272.333	240	253.333	266.667	353.667
495	29700	305.667	243	283	287.667	358.667

## Sheet: Ca
Time (hr)	Time (min)	DWCB	VTCB	SVCB	Biochar
0.125	7.5	6.33333	3.66667	5.33333	4.33333
0.25	15	5.66667	4	5.33333	7
0.5	30	7	5	6.33333	7.66667
1	60	8.33333	5	8.66667	13
2	120	10	6.33333	10.6667	16
4	240	10	8	12.6667	18.6667
8	480	11.6667	9.66667	17.3333	20.6667
16	960	16.3333	15.6667	24.6667	31.3333
24	1440	21.3333	20	34.3333	39.6667
39	2340	37.6667	33.3333	49.6667	60.6667
51	3060	49.6667	45	67.6667	86
63	3780	69	59	80.3333	110
75	4500	84.6667	69.3333	110	140
87	5220	99	93.6667	133.333	163.333
99	5940	126.667	110	170	223.333
111	6660	150	150	176.667	230
123	7380	166.667	160	226.667	316.667
135	8100	216.667	206.667	240	320
147	8820	203.333	216.667	270	353.333
159	9540	246.667	226.667	236.667	320
171	10260	230	206.667	323.333	406.667
183	10980	270	263.333	280	356.667
195	11700	263.333	250	306.667	376.667
207	12420	270	263.333	310	373.333
219	13140	276.667	270	366.667	476.667
231	13860	310	333.333	393.333	476.667
243	14580	366.667	343.333	453.333	570
255	15300	423.333	376.667	460	593.333
267	16020	446.667	416.667	506.667	626.667
279	16740	483.333	456.667	553.333	666.667
291	17460	513.333	480	530	716.667
327	19620	553.333	520	623.333	736.667
351	21060	610	533.333	626.667	740
375	22500	683.333	593.333	610	826.667
399	23940	793.333	703.333	780	953.333
423	25380	676.667	663.333	756.667	903.333
447	26820	783.333	690	886.667	980
471	28260	783.333	813.333	923.333	1066.67
495	29700	726.667	693.333	923.333	1033.33
519	31140	703.333	633.333	820	890
543	32580	873.333	730	896.667	973.333
567	34020	910	770	1100	1066.67
591	35460	1100	896.667	1166.67	1133.33

## Sheet: K
Time (hr)	Time (min)	DWCB	VTCB	Biochar	SVCB
0.116667	7	6.66667	2	1.33333	1
0.366667	22	5	4	2.33333	1.33333
0.616667	37	7	5	3	2.66667
1.11667	67	8.33333	5	9	3
2	120	10	6	11	6
4	240	10	10	12	8.33333
8	480	11.6667	12.3333	15.3333	15
16	960	16.3333	16	21	23
24	1440	21.3333	19	23.3333	27
39	2340	37.6667	26	28	33.6667
51	3060	49.6667	31	34	40
63	3780	69	36.3333	37	44.6667
75	4500	84.6667	41.3333	42.3333	52.6667
87	5220	99	48.6667	45.3333	54.3333
99	5940	126.667	51.3333	49.3333	65
111	6660	150	60.3333	51.3333	65.3333
123	7380	60.3333	62.3333	62.6667	75
135	8100	70.3333	73.6667	63	75
147	8820	75	68.3333	68.3333	91.6667
159	9540	78	81.6667	71.3333	95
171	10260	87	87.6667	81.6667	98.6667
183	10980	94.3333	96	84.3333	106.667
195	11700	98.3333	99.6667	89.3333	108.667
207	12420	106.667	110	82.3333	106.667
219	13140	116.667	110	98	113.333
231	13860	123.333	110	99	126.667
243	14580	140	126.667	110	140
255	15300	133.333	130	113.333	143.333
267	16020	156.667	145.333	123.333	153.333
279	16740	170	153.333	140	163.333
291	17460	173.333	156.667	146.667	173.333
327	19620	220	183.333	143.333	180
351	21060	243.333	206.667	170	196.667
375	22500	286.667	230	180	210
399	23940	340	270	213.333	266.667
423	25380	416.667	293.333	246.667	290
447	26820	436.667	323.333	270	336.667
471	28260	473.333	356.667	293.333	366.667
495	29700	503.333	400	316.667	386.667
519	31140	540	426.667	360	420
543	32580	623.333	490	403.333	486.667
567	34020	716.667	576.667	463.333	563.333
591	35460	866.667	683.333	553.333	663.333

## Sheet: NO3
Time (hr)	Time (min)	DWCB	VTCB	SVCB	Biochar
0.116667	7	16.3333	12.3333	14.3333	13
0.366667	22	14.3333	13.3333	13.6667	13.6667
0.616667	37	15	13.6667	14.6667	14.6667
1.11667	67	14.6667	14	14.6667	15.3333
2	120	15	14.3333	13.6667	18
4	240	14.6667	17.6667	15.3333	18.3333
8	480	17	16.6667	17	19.6667
16	960	15.6667	15.3333	18	16
24	1440	17.6667	15.6667	14.3333	15.3333
39	2340	11	11.3333	11.3333	10.6667
51	3060	10.3333	12.3333	13	11.3333
63	3780	10	10.6667	10.3333	10.6667
75	4500	9	9.33333	12	11.6667
87	5220	10	10	11.6667	12
99	5940	10.6667	10	13	12.3333
111	6660	10	10	16	13
123	7380	9.33333	11	15.6667	12.3333
135	8100	9	10.6667	20.3333	14.3333
147	8820	13	12.3333	17.3333	13.6667
159	9540	11	13.6667	19	15.6667
171	10260	13.3333	16	16.6667	13.6667
183	10980	14.3333	12.6667	24.6667	18
195	11700	13	16	26.6667	21
207	12420	13.3333	20	20.6667	17
219	13140	19.6667	17.6667	22.6667	17.3333
231	13860	12	15	23.6667	16.6667
243	14580	12.3333	15.3333	23	17.3333
255	15300	11.3333	16.6667	20	14.3333
267	16020	11.6667	14	27.3333	19
279	16740	13.3333	18	31.6667	21.3333
291	17460	13	21.3333	36	24.3333
303	18180	13.6667	21.6667	30.111	24.7
327	19620	25	25.3333	26.3333	22.3333
351	21060	13.3333	18.3333	29	20.6667
375	22500	15	18	23.6667	19.6667
399	23940	14	21.3333	34.6667	24
423	25380	18.3333	23	33.6667	25.6667
447	26820	33.6667	33.6667	38	29
471	28260	40	20.6667	34.6667	25.3333
495	29700	36.6667	39.3333	41.3333	32.3333
519	31140	17.3333	24	32.6667	24
543	32580	16.3333	19.3333	26.3333	23
567	34020	16.3333	18.6667	30	21
591	35460	18	23	32	29.3333

## Sheet: Na
Time (hr)	Time (min)	DWCB	VTCB	SVCB	Biochar
0.116667	7	13.3333	14	17.6667	15
0.366667	22	14	14	16.3333	16.3333
0.616667	37	15	14.3333	16.6667	17
1.11667	67	15.3333	14	17	19
2	120	16	14.3333	18	19.3333
4	240	17	15	18.3333	20
8	480	16	17.3333	20	21
16	960	18.3333	19.3333	21	24.6667
24	1440	20	19.6667	23	23.6667
39	2340	22	23	26	26
51	3060	25.3333	25	32.3333	30.3333
63	3780	28.3333	29.3333	32	33
75	4500	36.6667	32.6667	37.6667	38.3333
87	5220	34.3333	36.6667	38.6667	39.3333
99	5940	38.6667	37	46.6667	45.6667
111	6660	42	45.3333	47	48
123	7380	44.6667	47.3333	56	58
135	8100	54	55.6667	53.6667	55.3333
147	8820	53.3333	52.3333	61.3333	62
159	9540	58.3333	60.3333	59	58
171	10260	60.6667	59	65.6667	66.6667
183	10980	66.3333	64	64.3333	65.6667
195	11700	64.6667	64.6667	75.3333	70
207	12420	75.6667	68.6667	68.6667	70
219	13140	81.6667	67.3333	77.3333	79.6667
231	13860	75	76.3333	78.6667	80.3333
243	14580	79.3333	79	90.3333	92.3333
255	15300	88.3333	89.3333	89	91.3333
267	16020	90.6667	90.3333	96	95
279	16740	96	96.3333	97	100
291	17460	99	97	100	106.667
327	19620	110	110	110	110
351	21060	120	120	120	120
375	22500	133.333	130	130	130
399	23940	156.667	153.333	150	150
423	25380	170	160	160	160
447	26820	190	180	176.667	180
471	28260	203.333	193.333	190	193.333
495	29700	200	196.667	190	203.333
519	31140	220	213.333	210	220
543	32580	246.667	243.333	240	243.333
567	34020	290	280	280	283.333
591	35460	350	333.333	350	330
